# Supplementary material for: Early whole-body mutant huntingtin lowering averts changes in proteins and lipids important for synapse function and white matter maintenance in the LacQ140 mouse model
Source: PubMed Central journal article supplement — Neurobiol Dis. Author manuscript; Available in PMC 2023 Dec 20. (PMC10731584; doi:10.1016/j.nbd.2023.106313), 2023-09-28

**Fig 2a**

Ab1 1:50 + Vinculin 1:2000

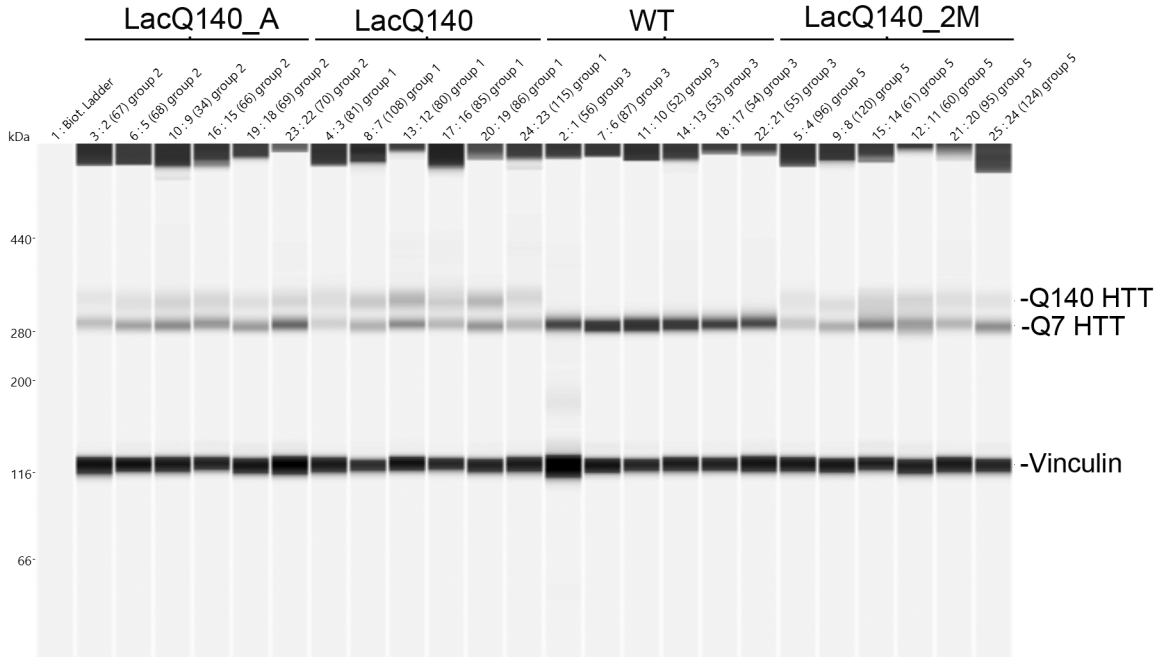

MW1 1:50 + Vinculin 1:2000

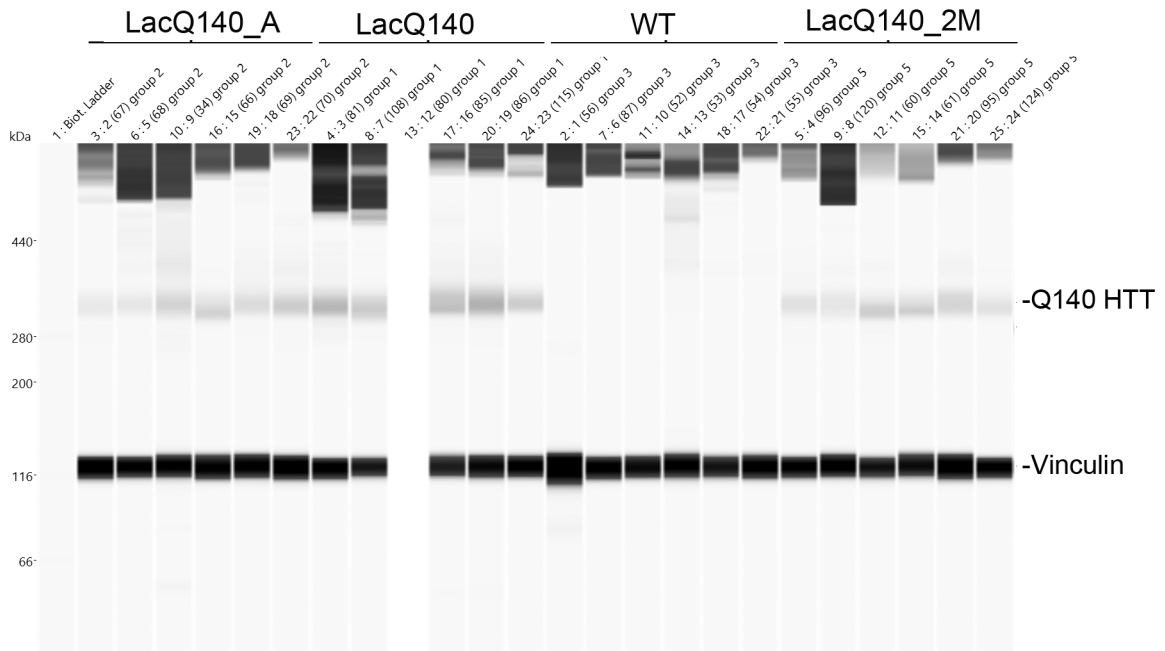

**Fig 2b**

Ab1 1:50 + Vinculin 1:2000

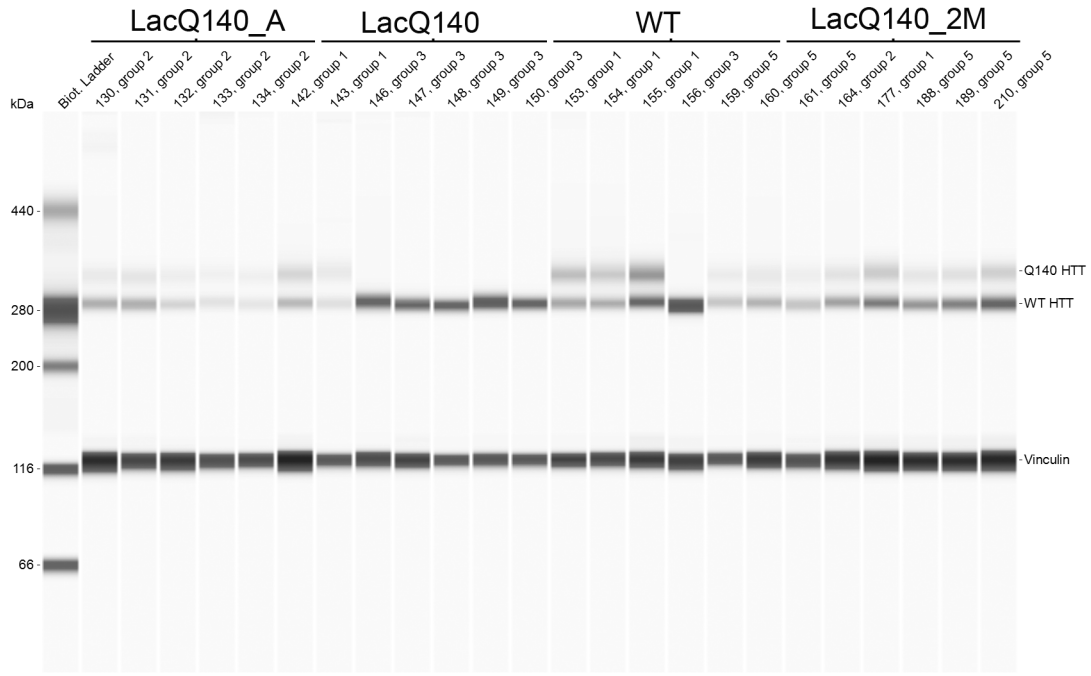

MW1 1:50 + Vinculin 1:2000

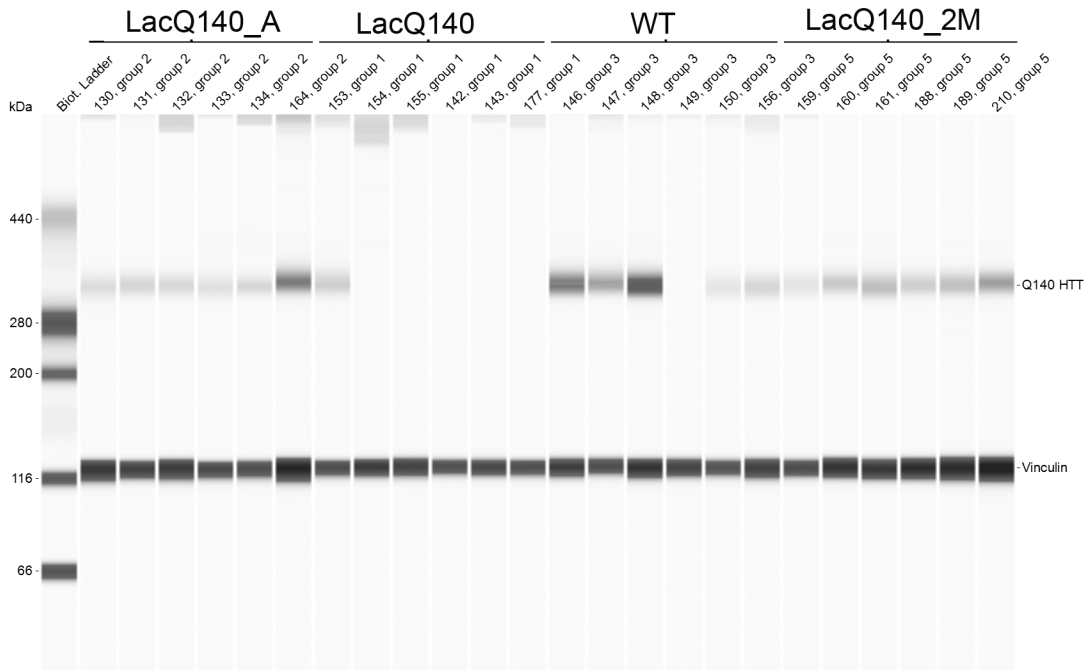

# Fig 2c

Ab1

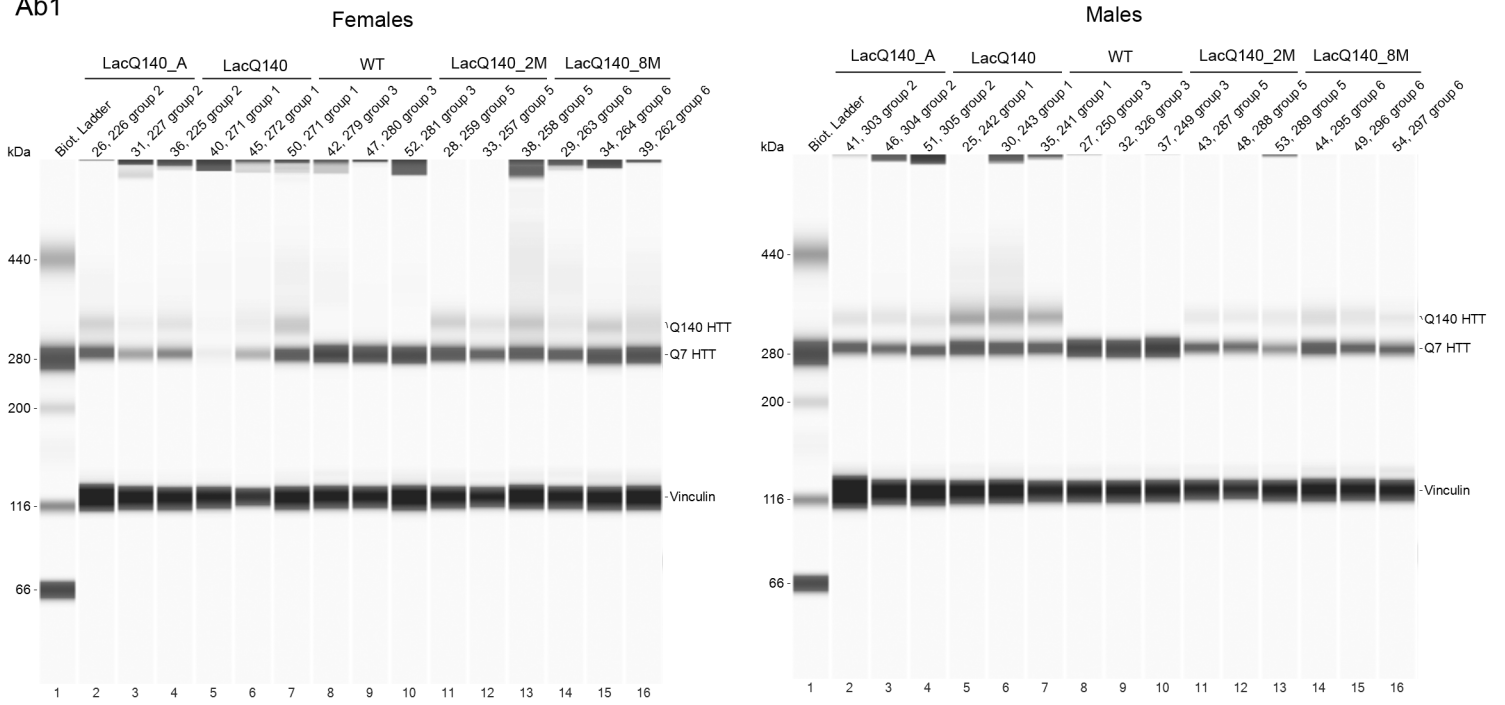

MW1

Group 1 = LacQ140  
 Group 2 = LacQ140\_A  
 Group 5 = LacQ140\_2M  
 Group 6 = LacQ140\_8M

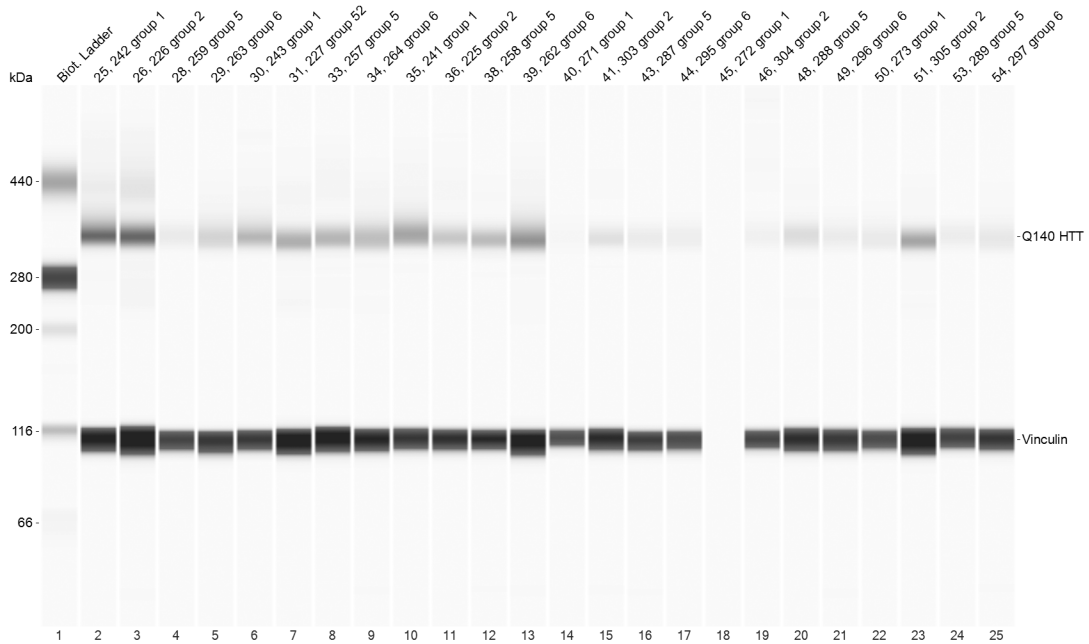

**Fig 3a**

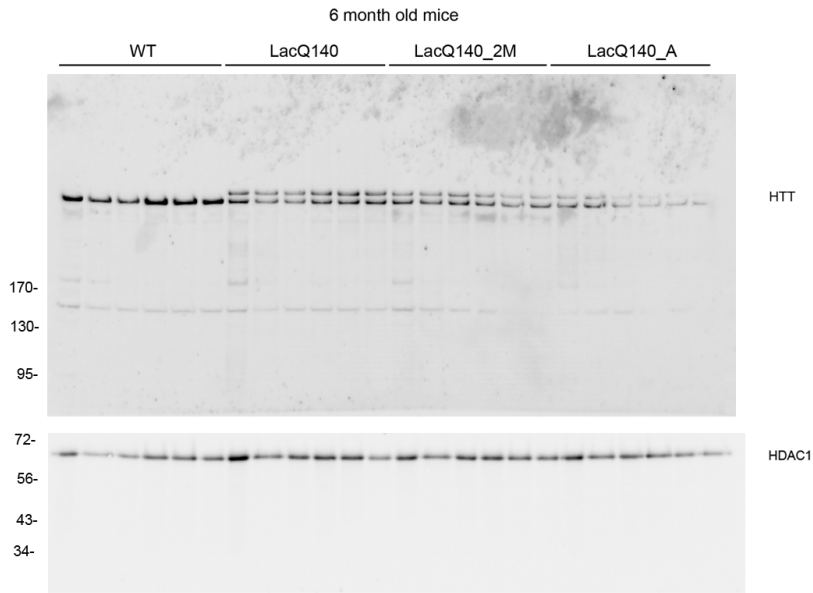

**Fig 3b**

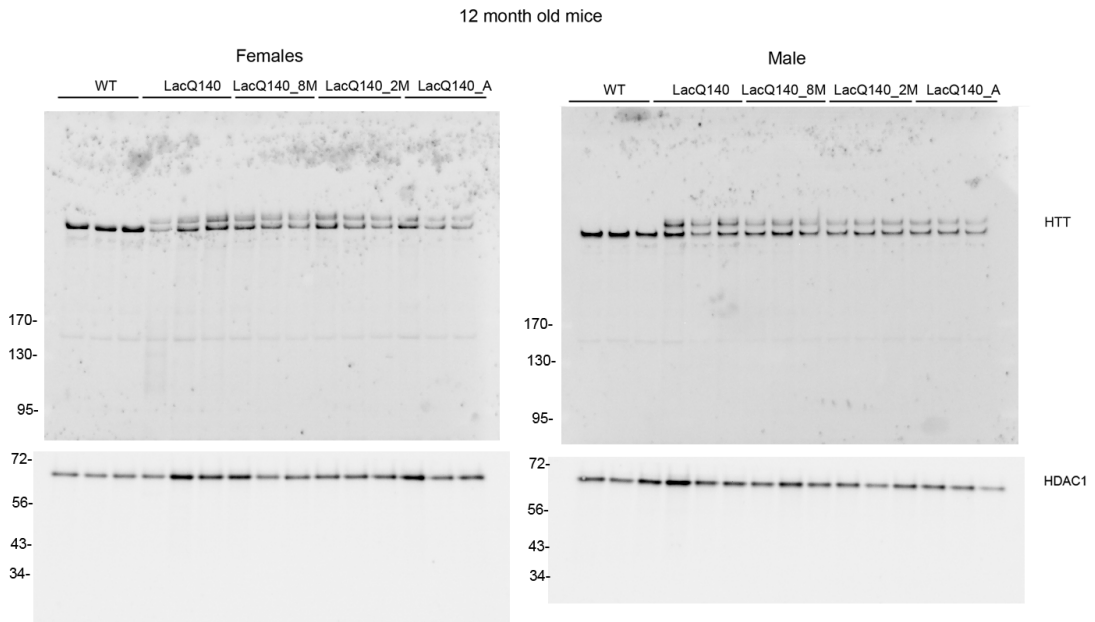

**Fig 3c**

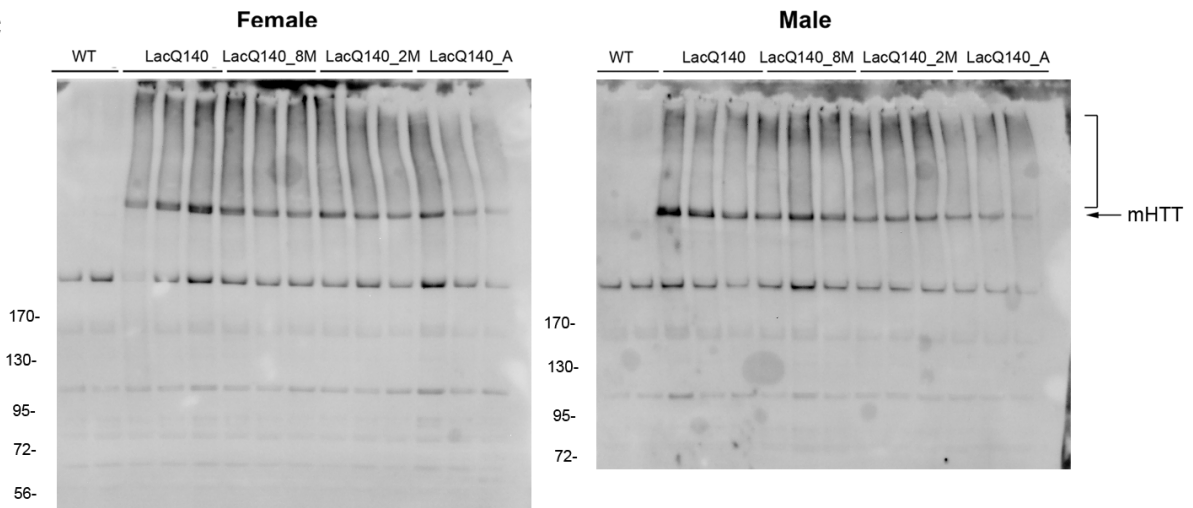

**Fig S1a**

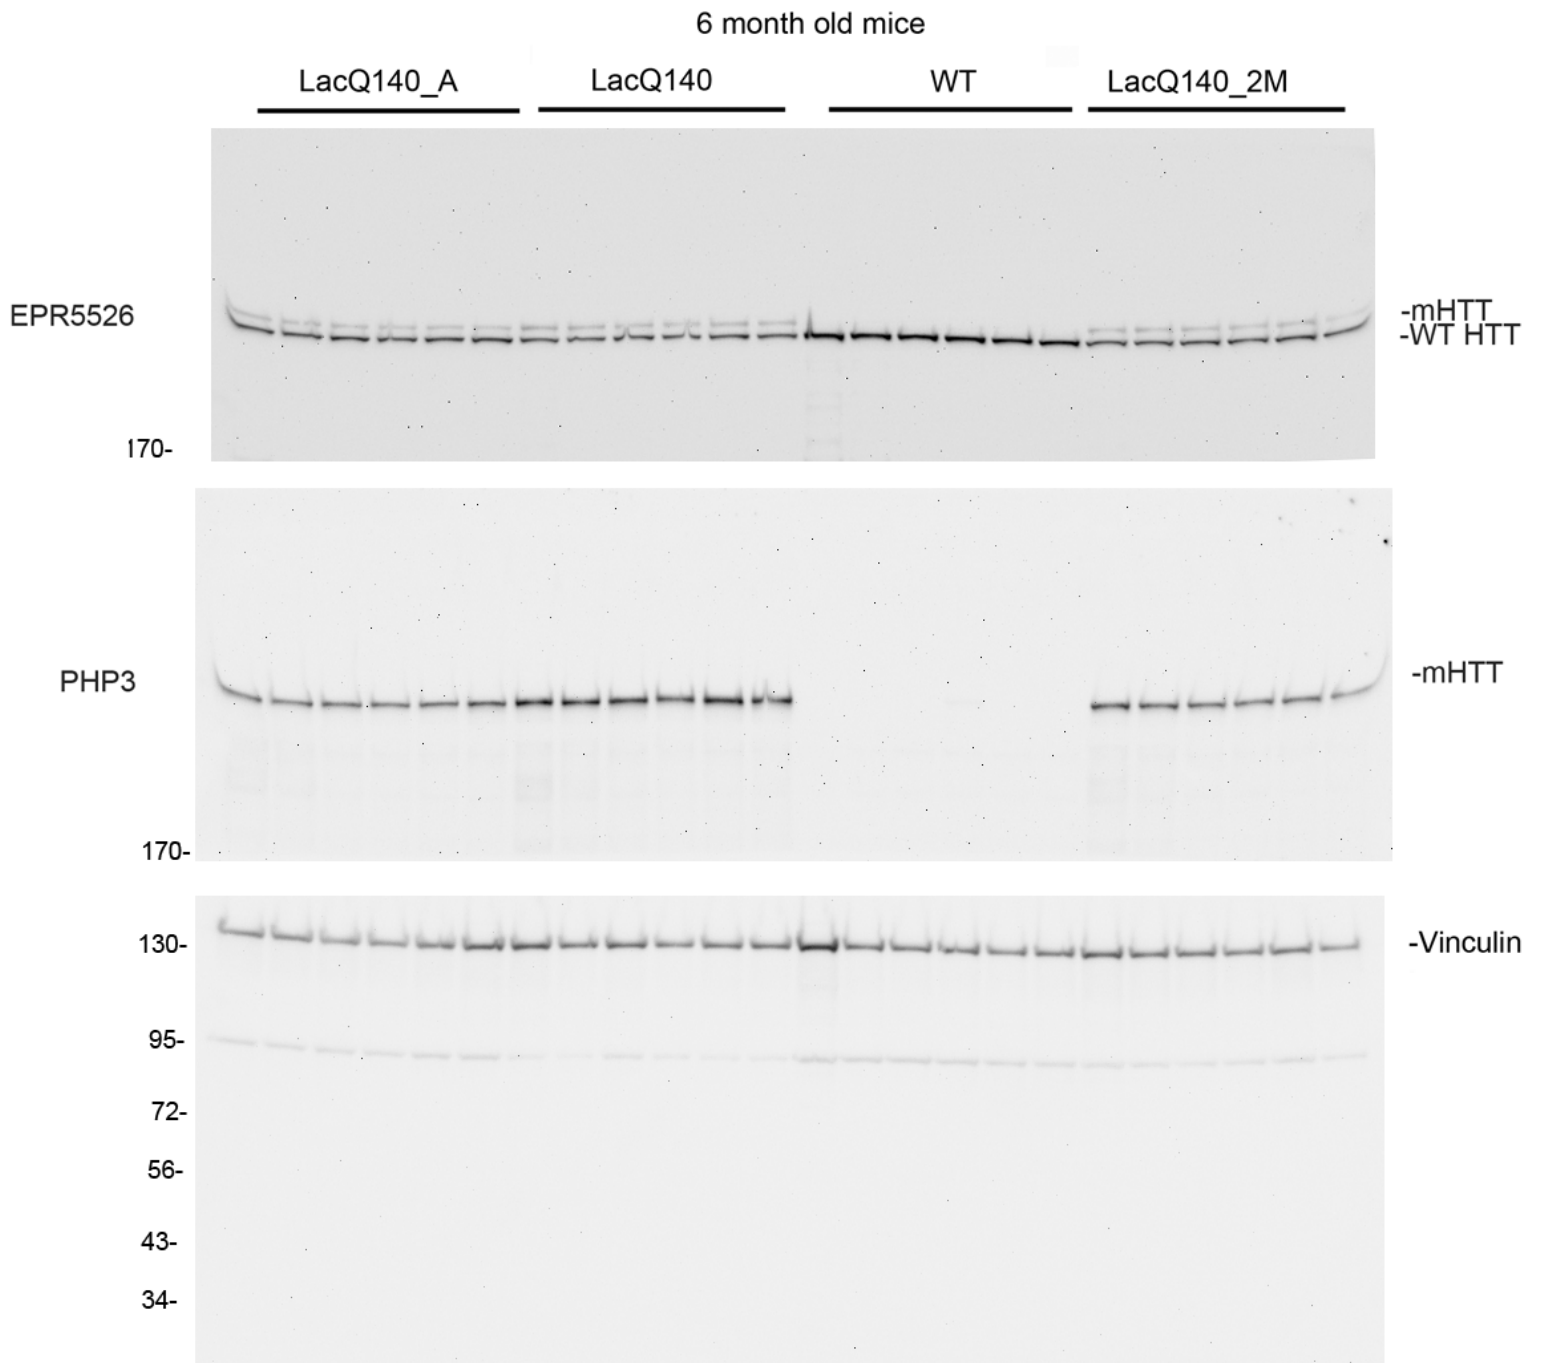

**Fig S1b**

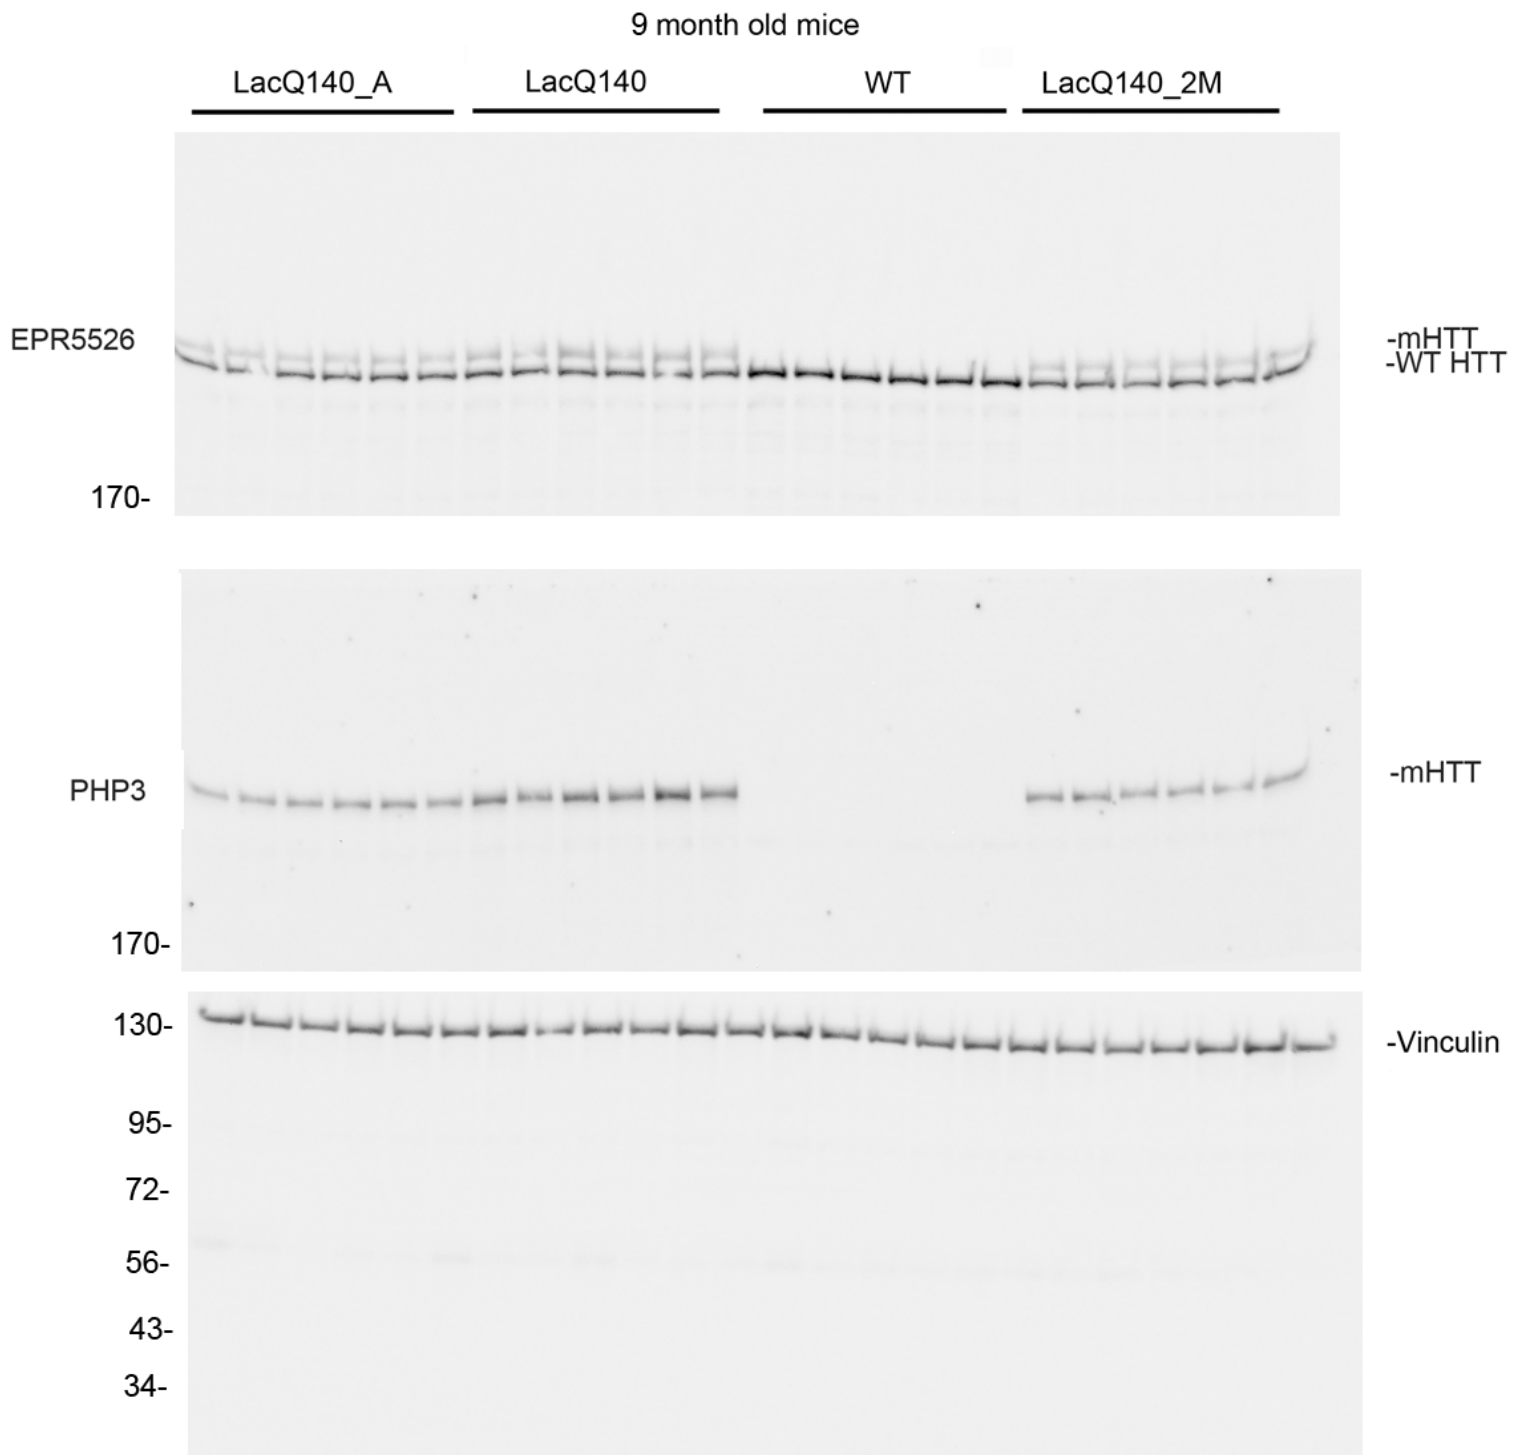

**Fig S1c**

12 month old mice

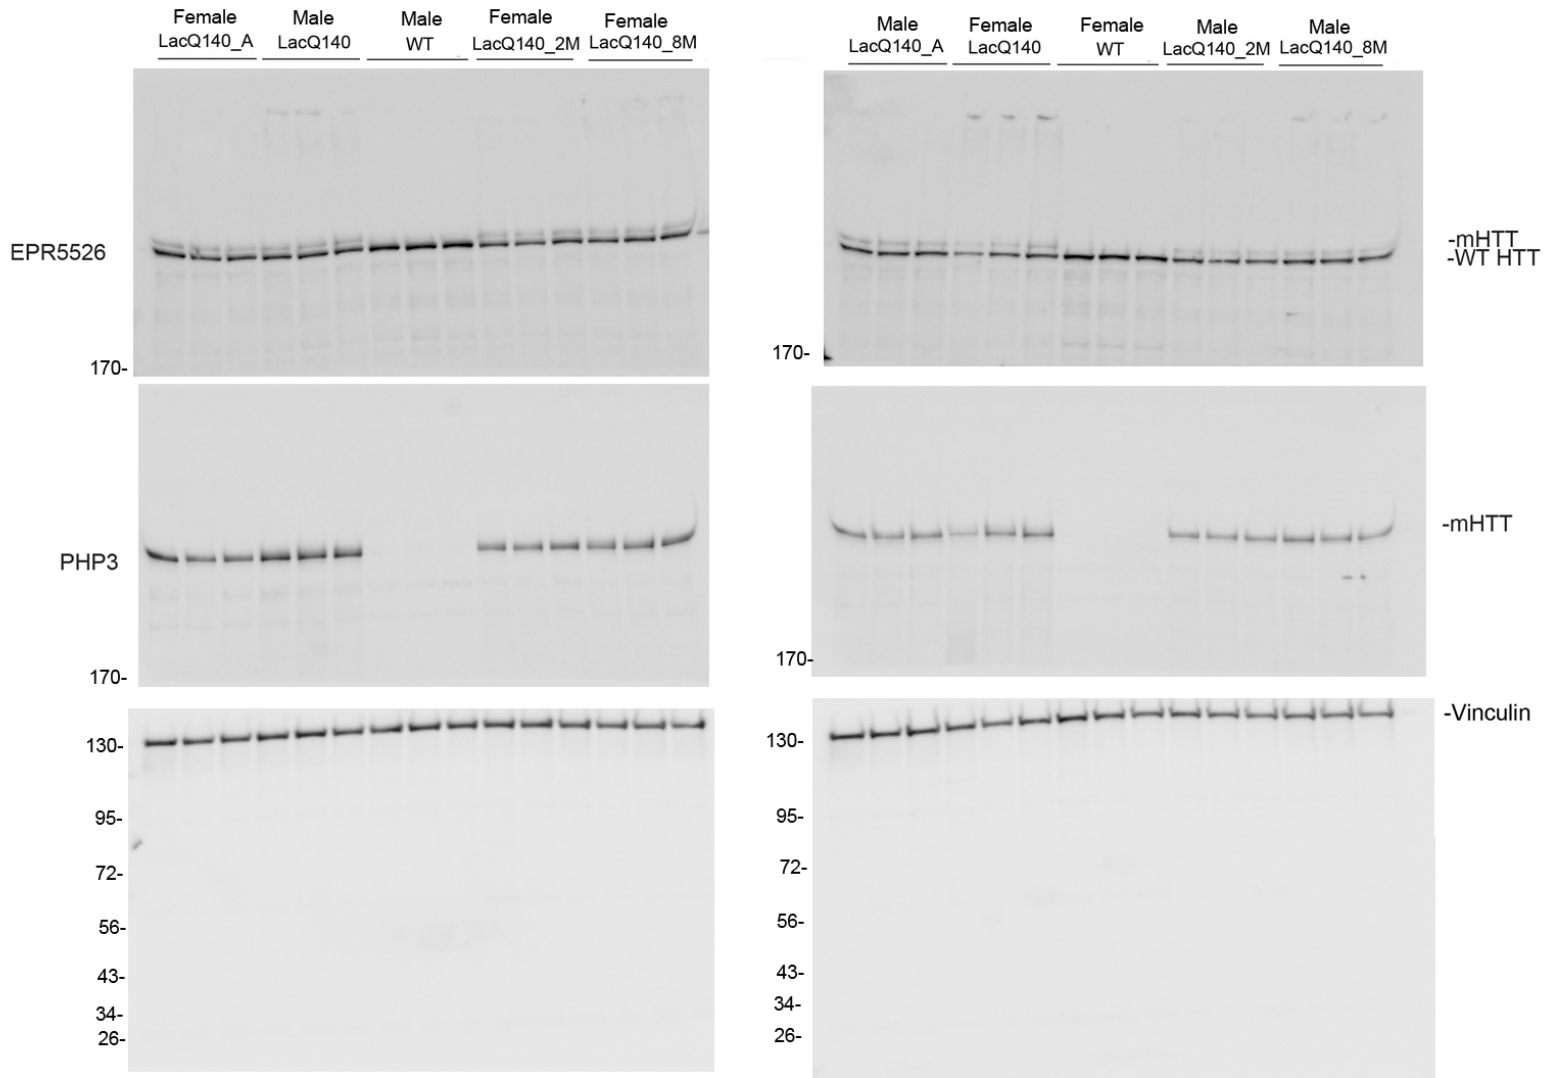

**Fig S2**

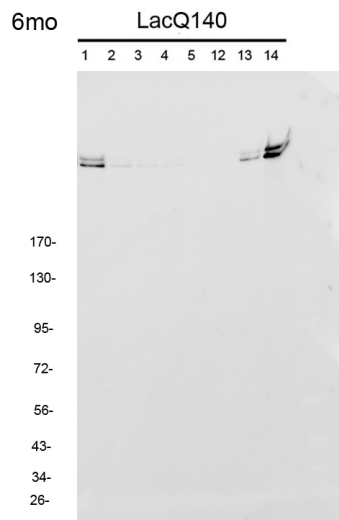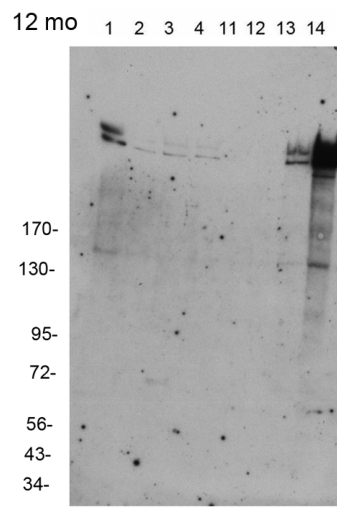

LacQ140

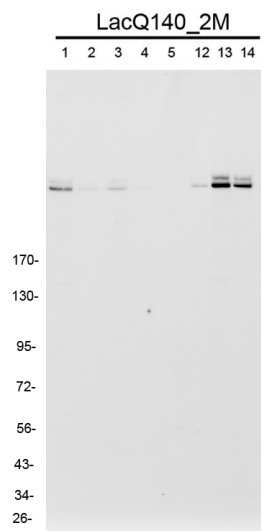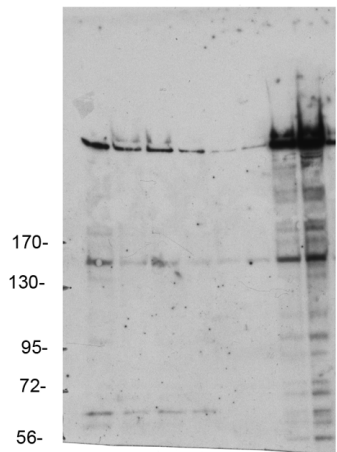

LacQ140\_8M

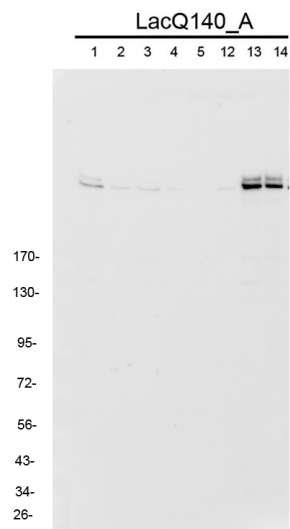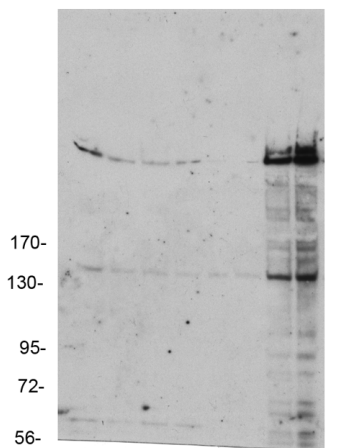

LacQ140\_2M

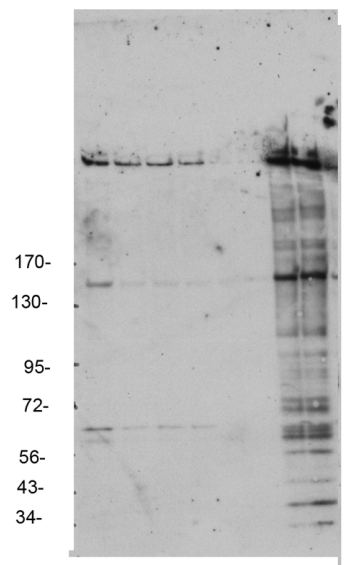

LacQ140\_A



**Fig S3a**

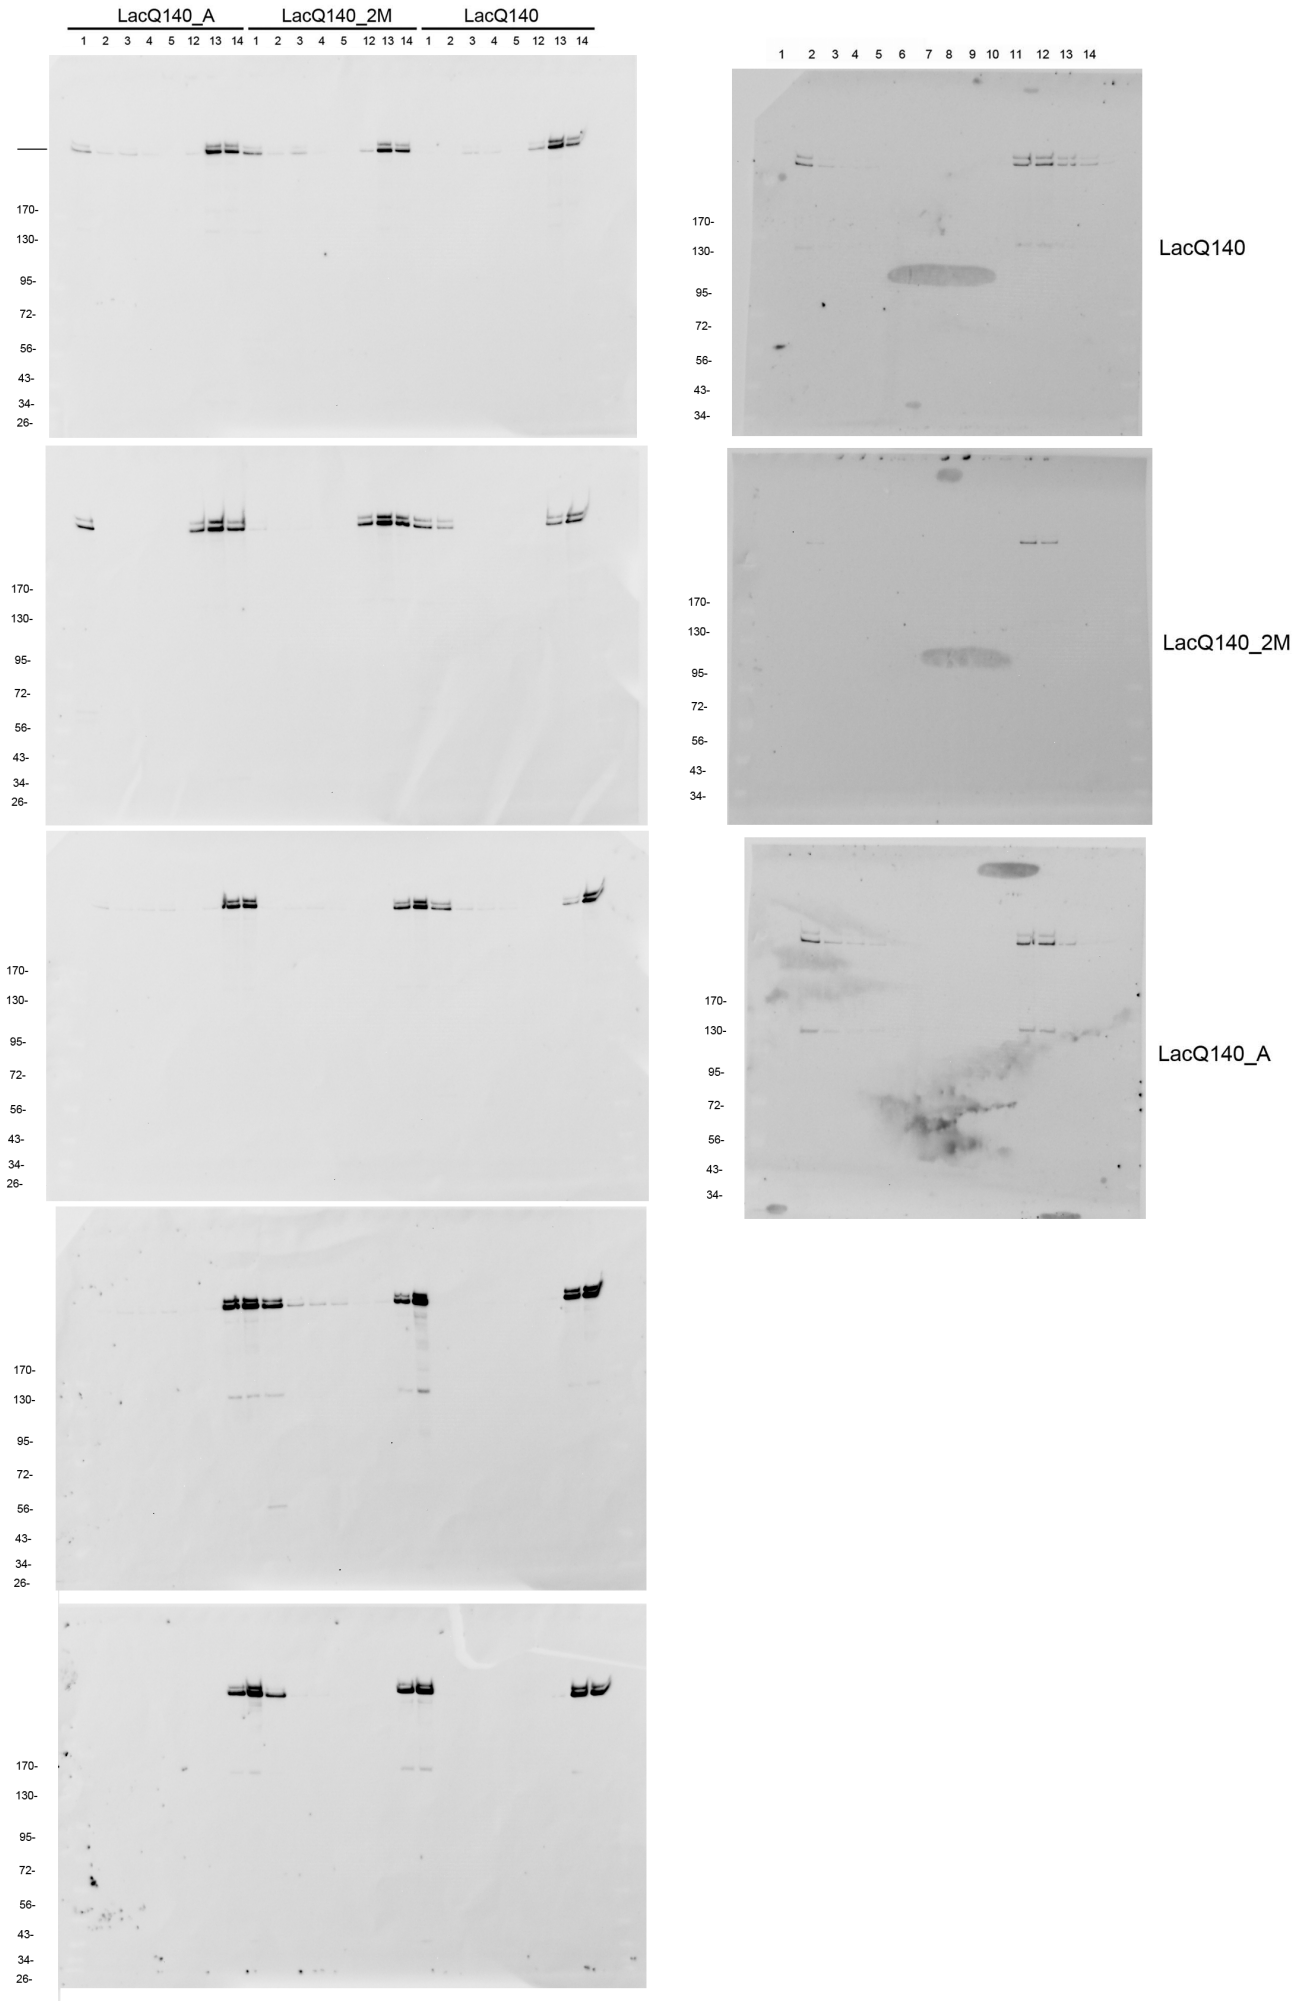

**Fig S3c**

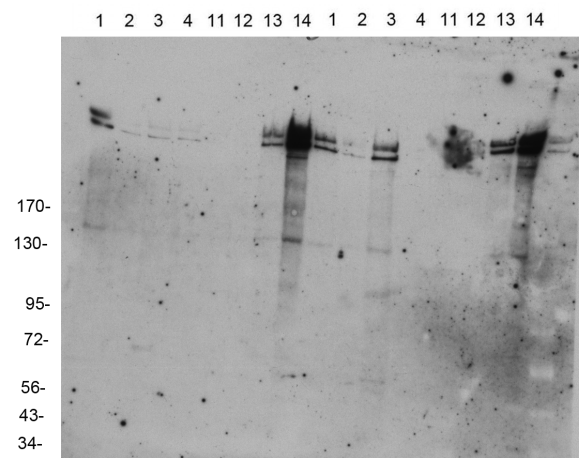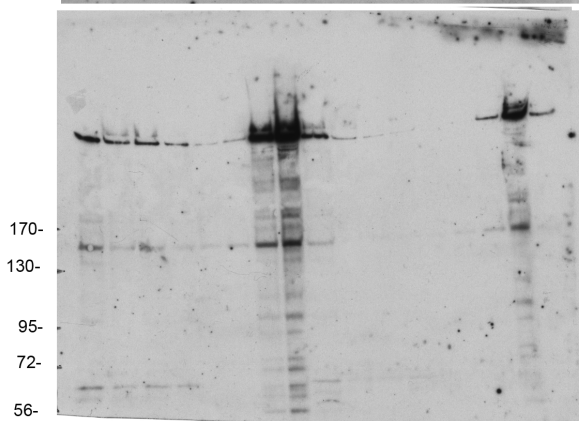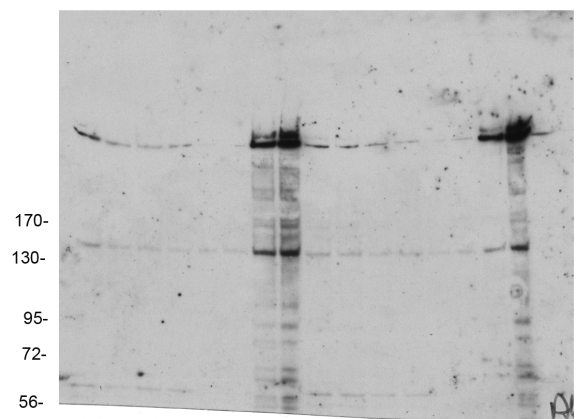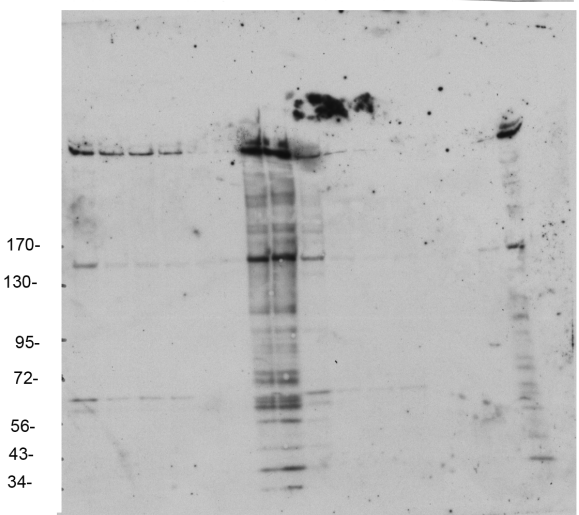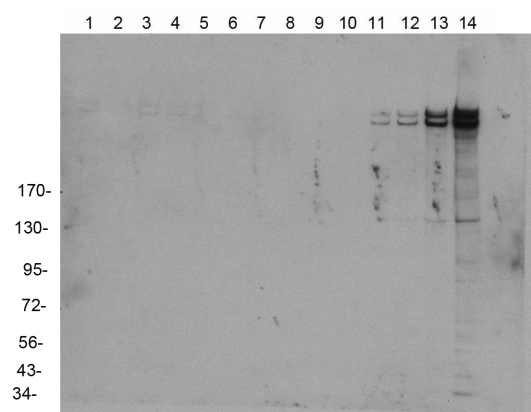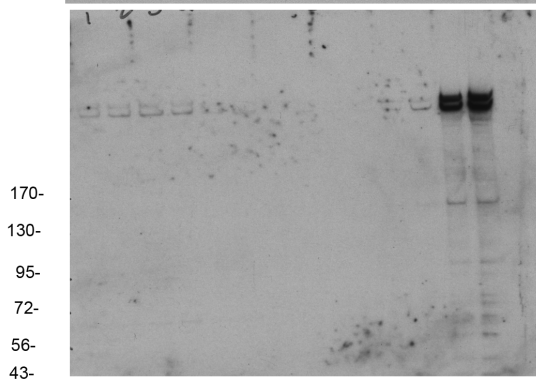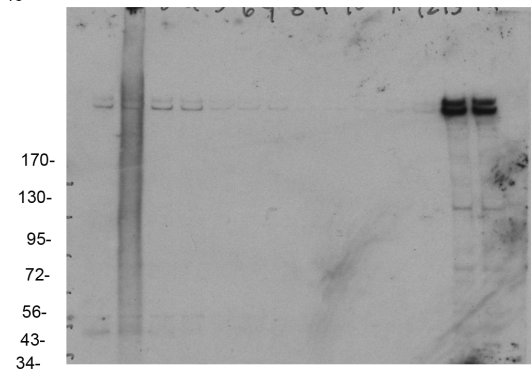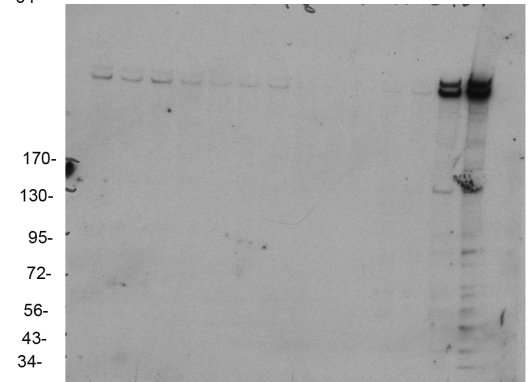

**Fig S5a**

6 month old mice

LacQ140\_A

LacQ140

WT

LacQ140\_2M

130-

95-

72-

56-

43-

34-

-PDE10A

130-

95-

72-

56-

43-

34-

-SCN4B

130-

95-

72-

56-

43-

34-

-Vinculin

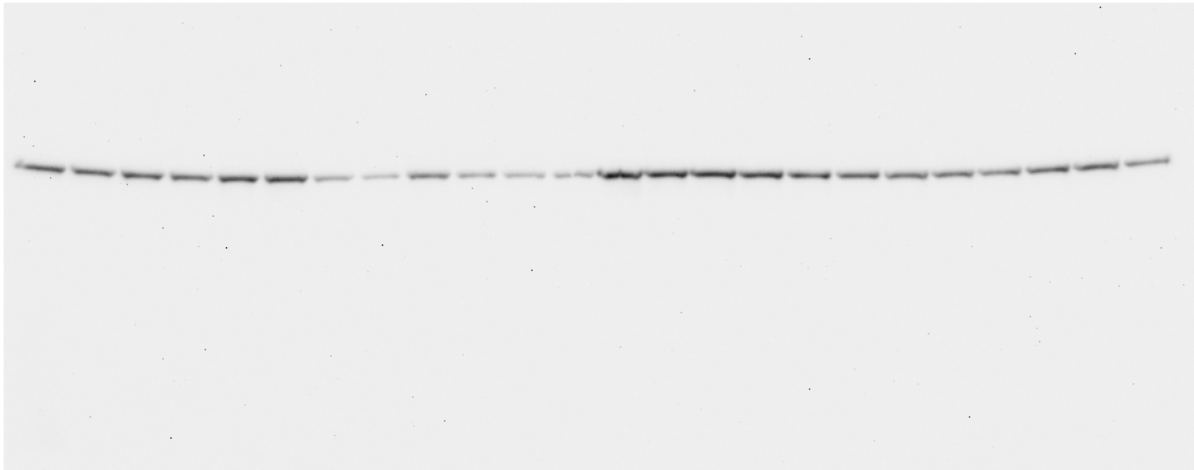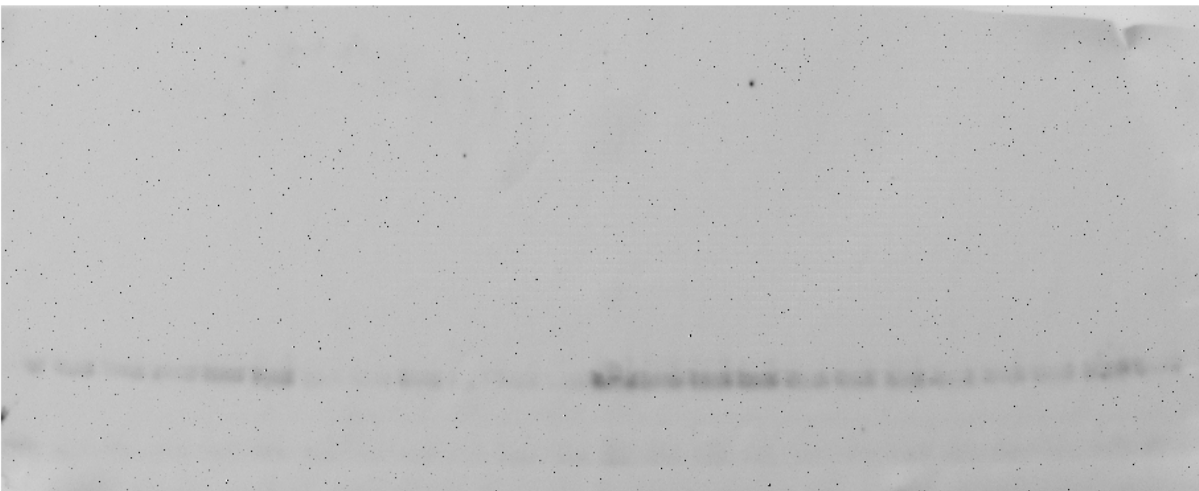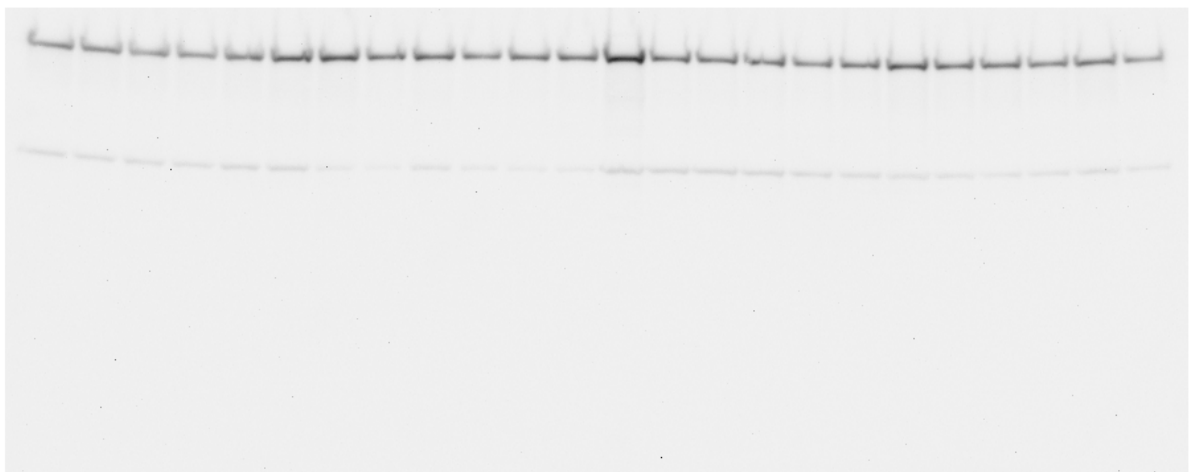

**Fig S5b**

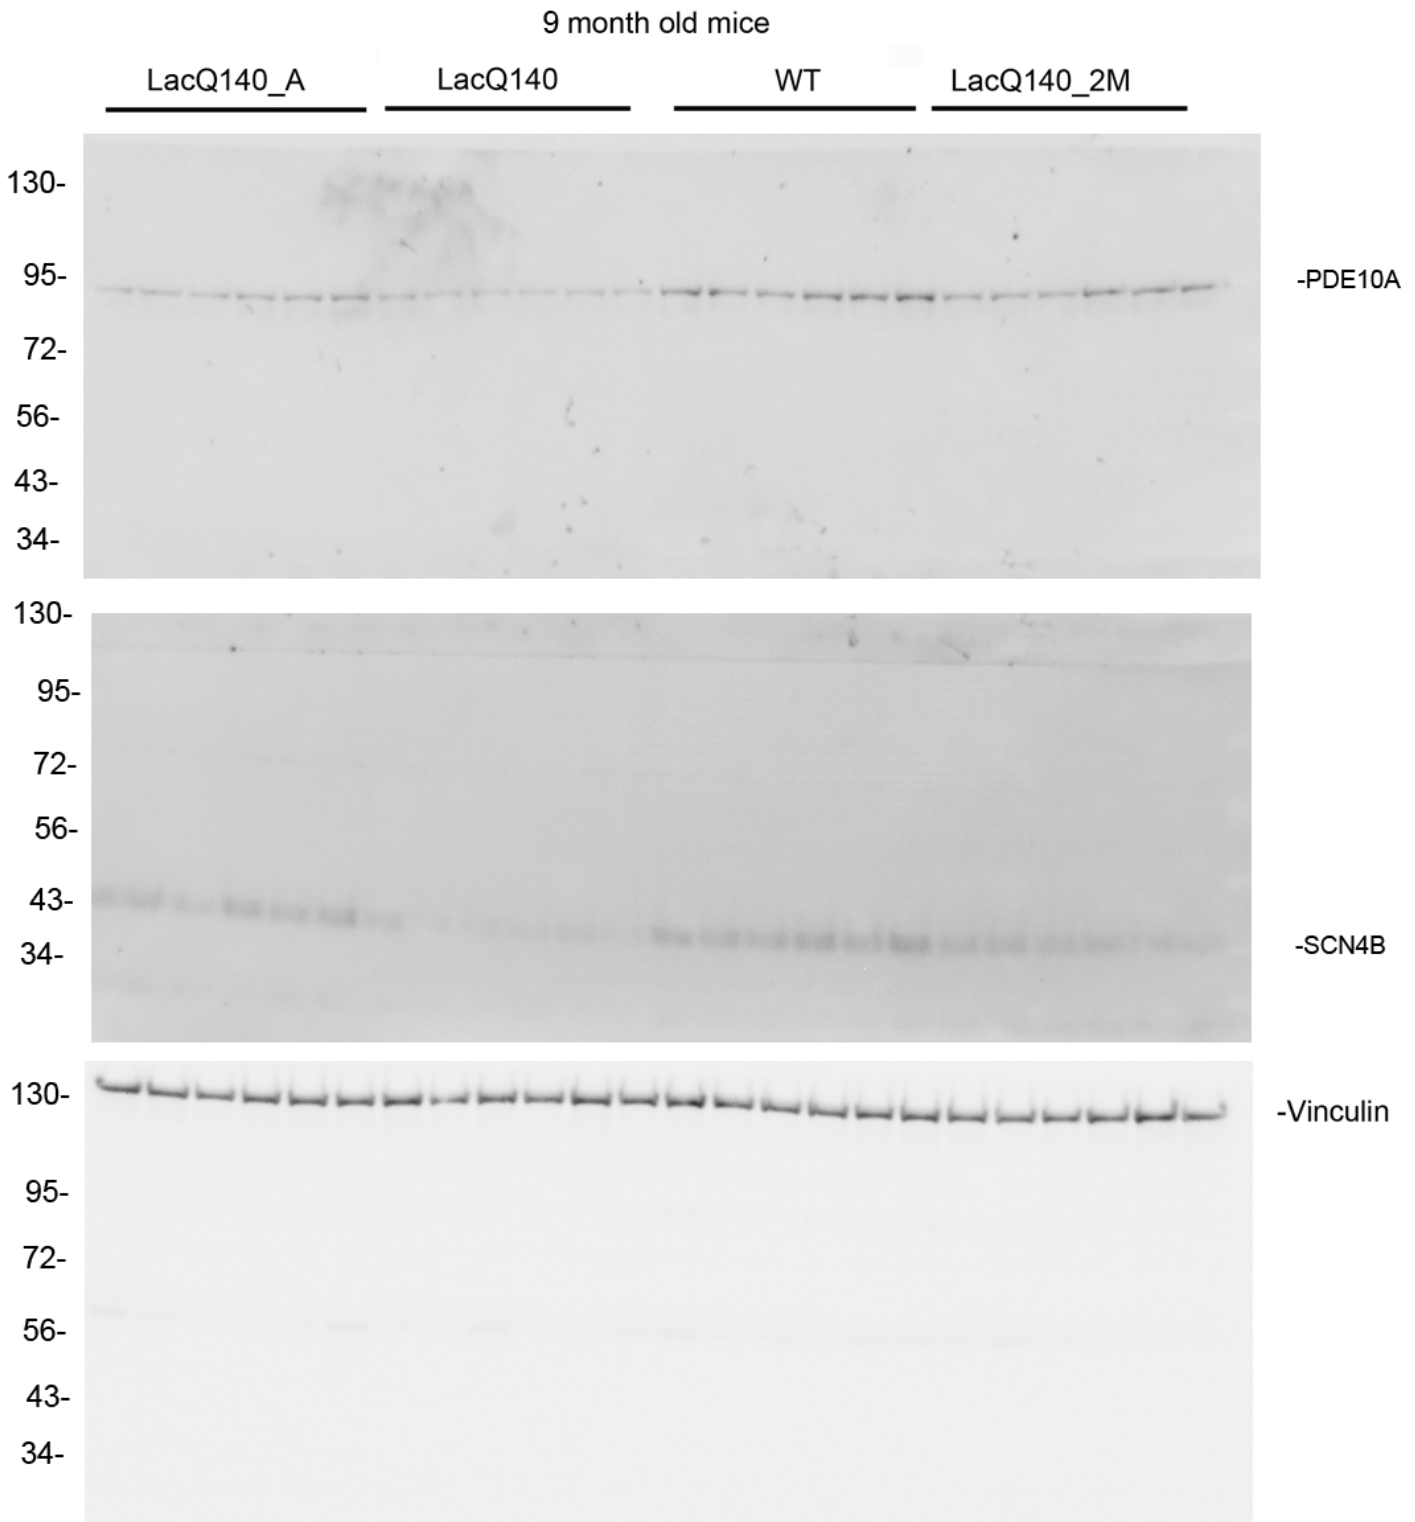



**Fig S6a**

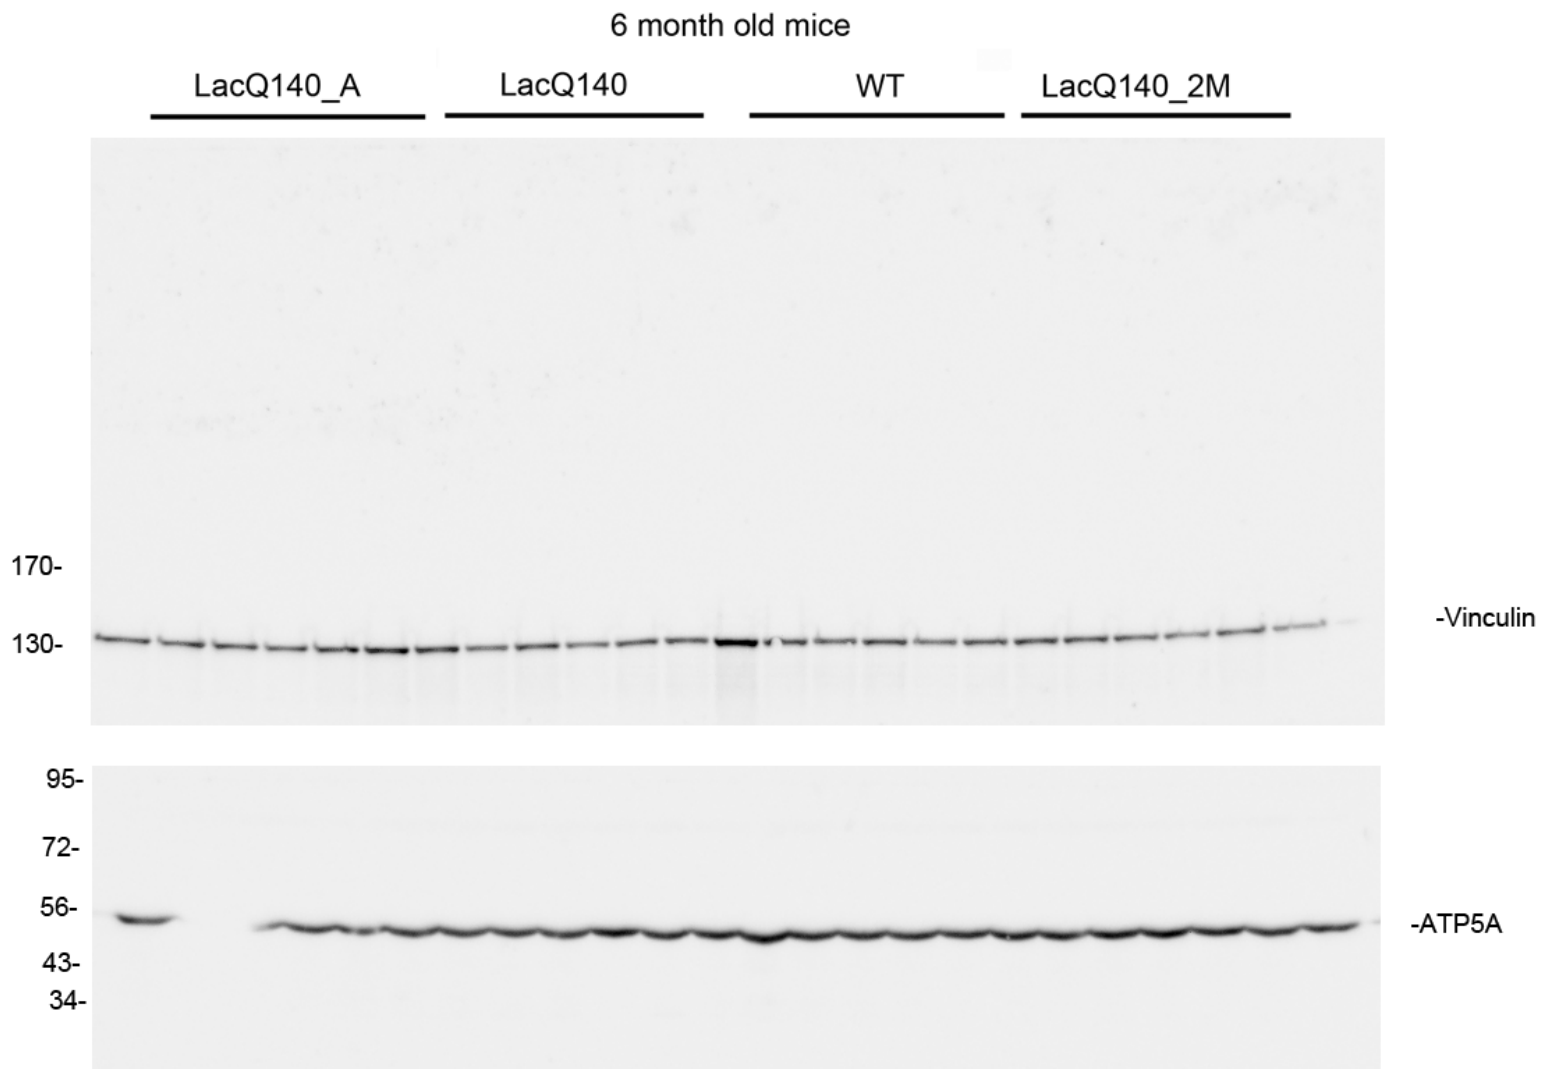

**Fig S6b**

9 month old mice

LacQ140\_A

LacQ140

WT

LacQ140\_2M

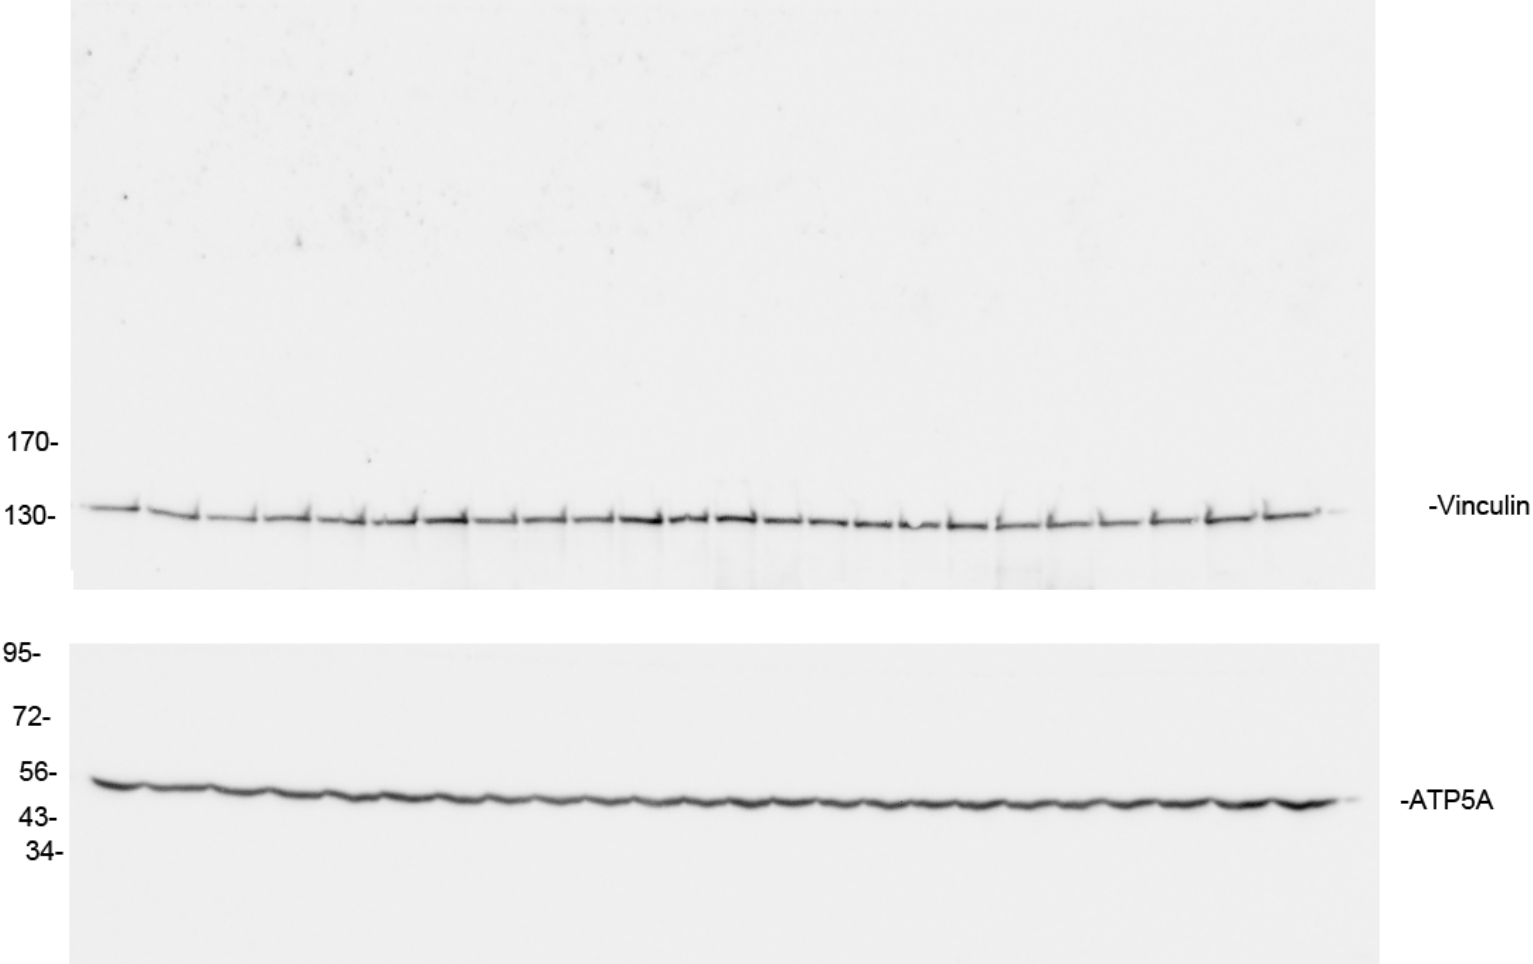

**Fig S6c**

12 month old mice

Female      Male      Male      Female      Female  
LacQ140\_A   LacQ140   WT      LacQ140\_2M   LacQ140\_8M

Male      Female      Female      Male      Male  
LacQ140\_A   LacQ140   WT      LacQ140\_2M   LacQ140\_8M

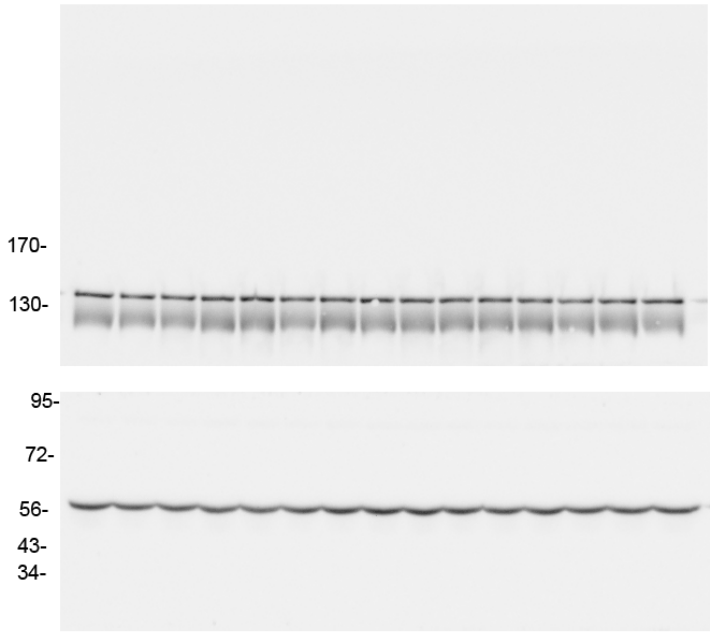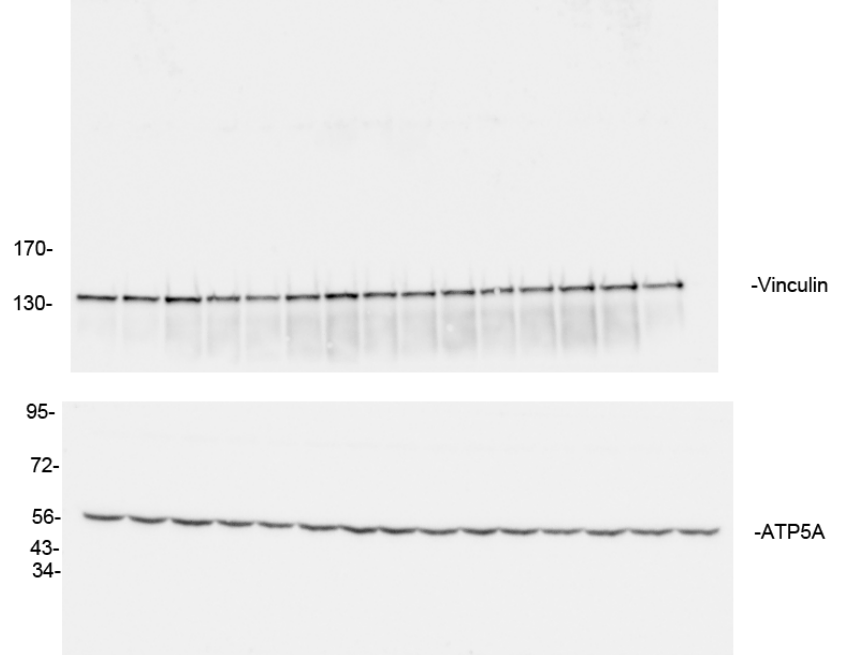

Supplement: NIHMS1939442-supplement-7.pdf [file NIHMS1939442-supplement-7.pdf]
